# Supplementary material
Source: Springer Nature journal article supplement (https://www.springermedizin.de/resource/supplementary/12887_2011_570_MOESM1_ESM.pdf/9475642)

Herzog 1986

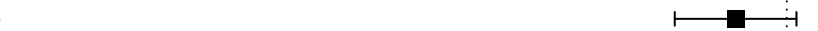

Fergusson 1988

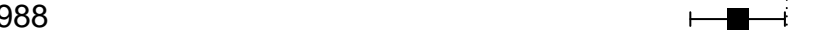

Fakjian 1990

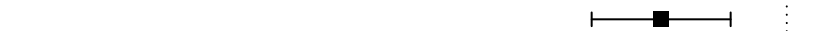

O'Farrell 2005

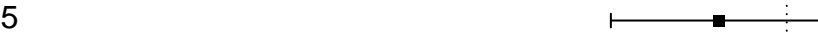

Wilson 1947

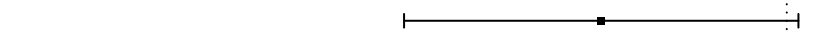

Taylor 1975

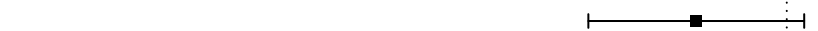

Mallon 2000

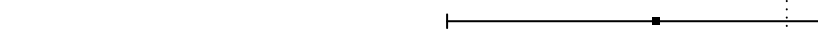

Krieger 2008

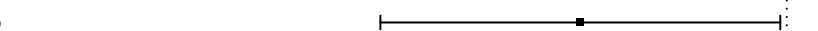

Random effects model

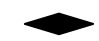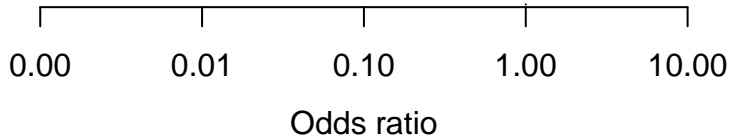

Supplement: MOESM1 [file 9475642]
